# Supplementary material for: Nanoemulsions Based on Sunflower and Rosehip Oils: The Impact of Natural and Synthetic Stabilizers on Skin Penetration and an Ex Vivo Wound Healing Model
Source: MDPI journal article supplement (doi:10.3390/pharmaceutics15030999), 2023-03-20
Supplement: s1 [file s1]

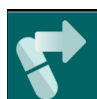

## Supplementary Material

# Nanoemulsions based on Sunflower and Rosehip Oils: The Impact of Natural and Synthetic Stabilizers on Skin Penetration and an Ex vivo Wound Healing Model

Cynthia Nara Pereira Oliveira <sup>1</sup>, Marcel Nani Leite <sup>2</sup>, Natália Aparecida de Paula <sup>2</sup>, Yugo Araújo Martins <sup>1</sup>, Sonia Aparecida Figueiredo <sup>3</sup>, Marco Andrey Cipriani Frade <sup>2</sup> and Renata Fonseca Vianna Lopez <sup>1,\*</sup>

<sup>1</sup> School of Pharmaceutical Sciences of Ribeirão Preto, University of São Paulo, Ribeirão Preto 14040-903, SP, Brazil; cynthianara@ufmg.br (C.N.P.O.); yugomartins@usp.br (Y.A.M.);

<sup>2</sup> Department of Internal Medicine, Faculty of Medicine of Ribeirão Preto, University of São Paulo, Ribeirão Preto 14049-900, SP, Brazil; marcelnani@gmail.com (M.N.L.); npbiomed@yahoo.com.br (N.A.d.P.); sonia.figueiredo@unifal-mg.edu.br (S.F.); mandrey@fmrp.usp.br (M.A.C.F.)

<sup>3</sup> Department of Food and Drug, School of Pharmaceutical Sciences, Federal University of Alfenas, Alfenas 37130-001, MG, Brazil; sonia.figueiredo@unifal-mg.edu.br (S.A.F.);

\* Correspondence: rvianna@fcrp.usp.br; Tel.: +55-16-3315-4202

**Table S1:** Significance results of the most suitable mathematical models found after ANOVA for each dependent variable (Software Design-Expert 11.1.0 © 2018 Stat-Ease)

| Dependent Variables     | Mathematical Model         | Significance (P)* |
|-------------------------|----------------------------|-------------------|
| Emulsification rate (%) | Quadratic                  | > 0.05            |
| Size (nm)               | Quadratic                  | > 0.05            |
| PDI                     | Average                    | > 0.05            |
| Viscosity (cP)          | Linear (log)               | < 0.05            |
| pH                      | Interaction of two factors | > 0.05            |
| Cost (\$/Kg)            | Linear                     | < 0.05            |

**Table S2:** Experimental data obtained after preparing the Nano-2 with the optimized composition and the statistical prediction given by the mathematical model

| Responses      | Mathematically predicted values | Experimentally obtained values* |
|----------------|---------------------------------|---------------------------------|
| Size (nm)      | 374 ± 26                        | 369 ± 15                        |
| PdI            | 0.284 ± 0.06                    | 0.23 ± 0.04                     |
| pH             | 5.6 ± 0.4                       | 5.7 ± 0.2                       |
| Viscosity (cP) | 80 ± 3                          | 79 ± 6                          |
| Cost (U\$)     | 192.85 ± 0.09                   | 192.85                          |

\*Mean  $\pm$  standard deviation from 3 independent experiments

**Table S3:** Physical-chemical characterization of nanoemulsions 24 h after preparation and followed by preliminary stability test

| Characteristic | Nanoemulsion        |                   |                     |                   |
|----------------|---------------------|-------------------|---------------------|-------------------|
|                | Nano-1              |                   | Nano-2              |                   |
| Collor         | White               |                   | Light beige         |                   |
| Viscosity (cP) | 20 $\pm$ 3          |                   | 79 $\pm$ 6          |                   |
| Odor           | Characteristic      |                   | Characteristic      |                   |
| pH             | Pre stability test  | 5.4 $\pm$ 0.2     | Pre stability test  | 5.7 $\pm$ 0.2     |
|                | Post stability test | 5.5 $\pm$ 0.3     | Post stability test | 5.8 $\pm$ 0.3     |
| Size (nm)      | Pre stability test  | 130 $\pm$ 3       | Pre stability test  | 363 $\pm$ 15      |
|                | Post stability test | 130 $\pm$ 5       | Post stability test | 332 $\pm$ 14      |
| PDI            | Pre stability test  | 0.197 $\pm$ 0.025 | Pre stability test  | 0.228 $\pm$ 0.040 |
|                | Post stability test | 0.210 $\pm$ 0.012 | Post stability test | 0.185 $\pm$ 0.056 |

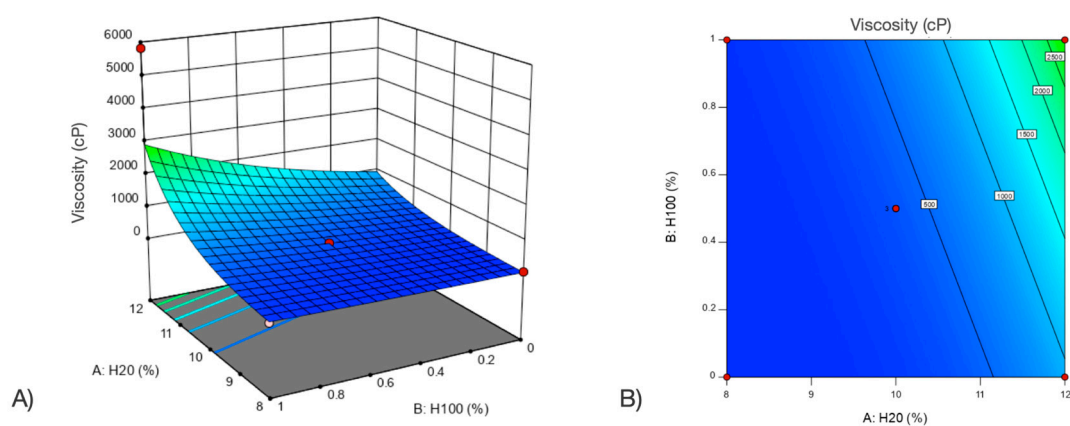

**Figure S1:** 3D graphs (A) and response surface graphs (B) for viscosity versus concentration in (%) of factors H20 and H100.

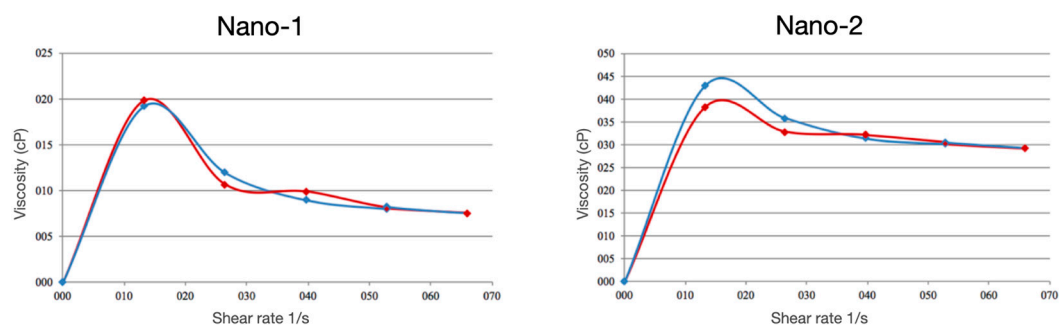

**Figure S2:** Rheological behavior of preparations. In red, the viscosity values related to the increase in shear rate and in blue, values obtained after shear reduction.

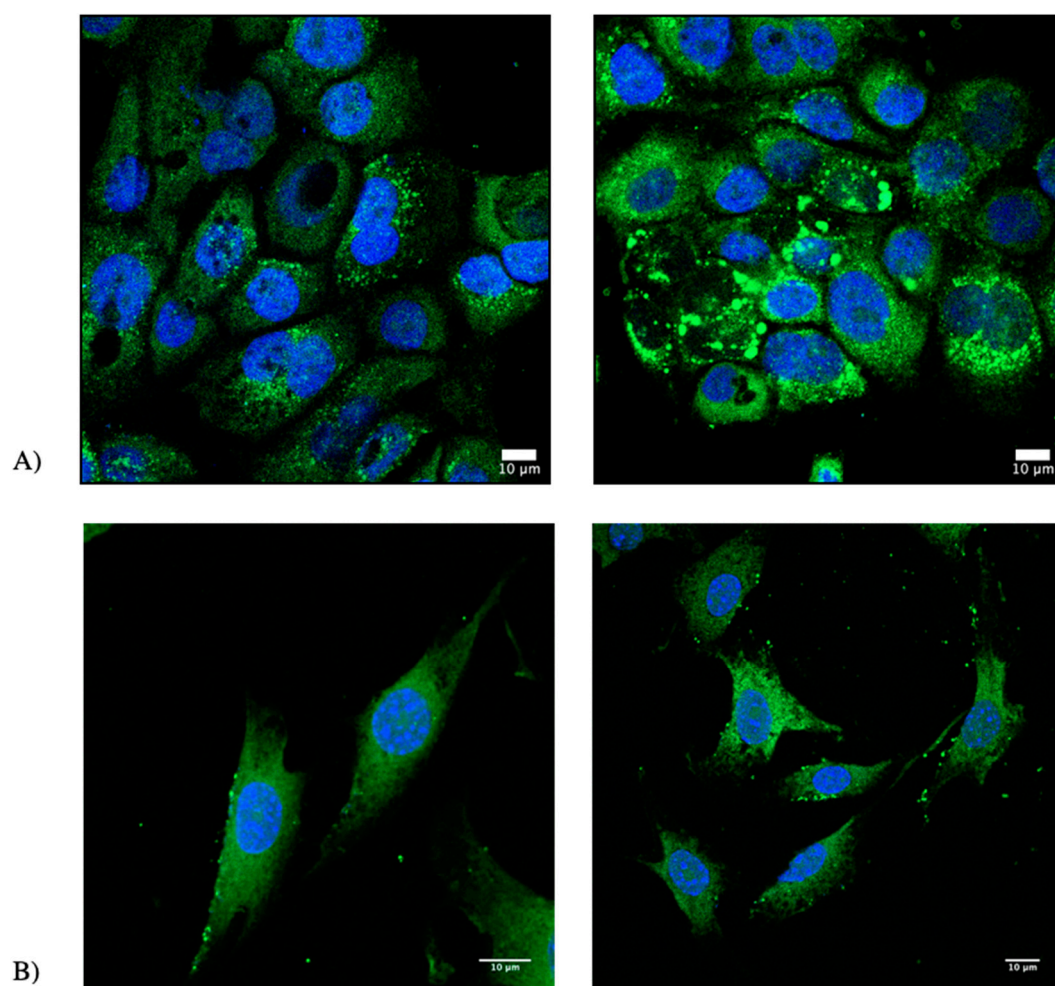

**Figure S3:** Representative images obtained by confocal microscopy of the uptake assay of the Nano 1 (left panel) and Nano 2 (right panel) formulations after 15 minutes of contact with HaCat keratinocyte cells (A) and NIH-3T3 fibroblasts (B).  $\lambda_{exc/em} = 477/512$  nm for visualization of bodipy in green,  $\lambda_{exc/em} = 405/413-472$  nm for visualization of cell nucleus - DAPI in blue.

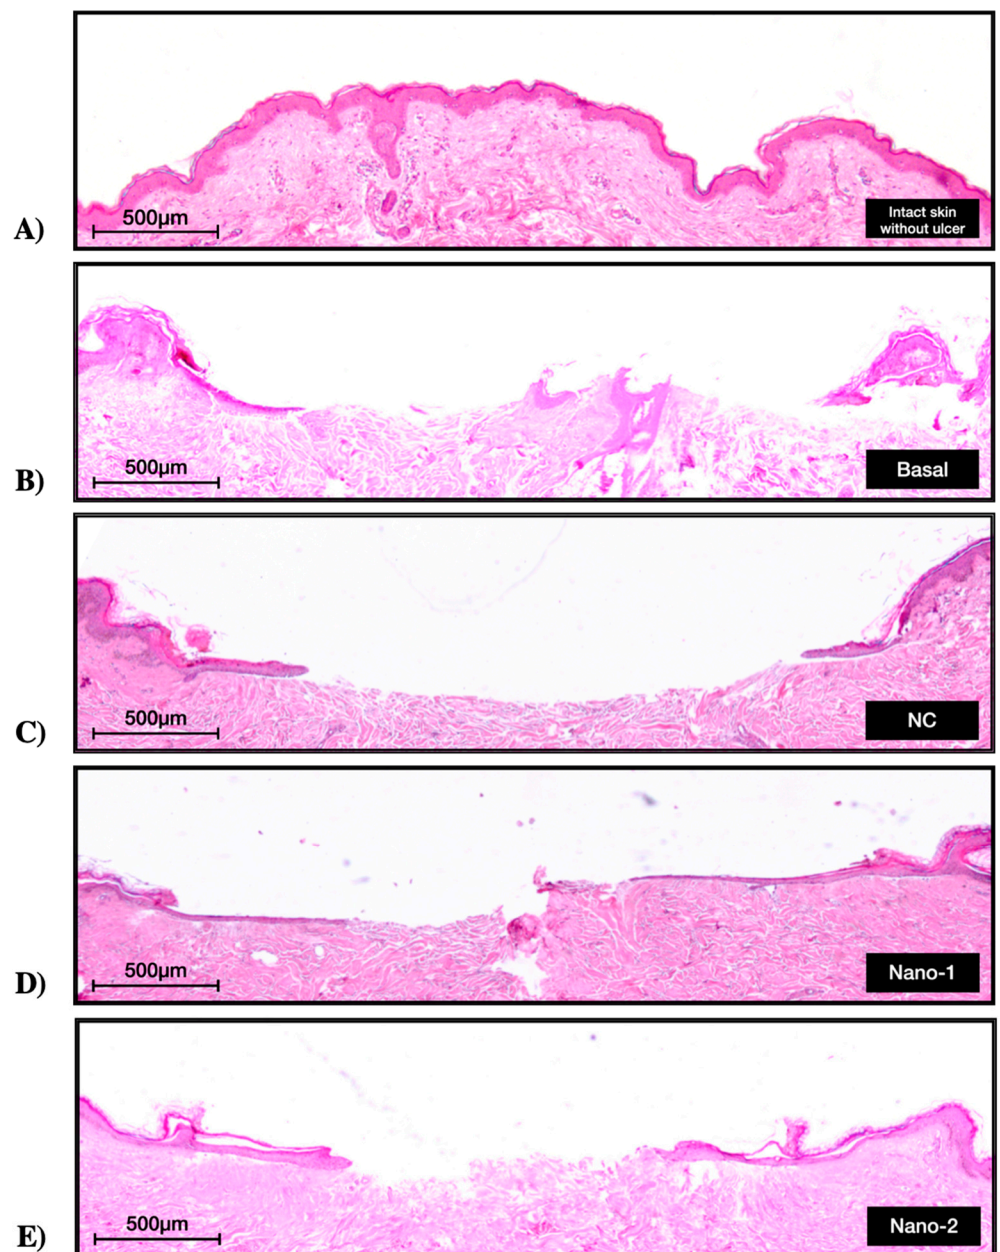

**Figure S4:** Representative images of graphic in Figure 10 obtained by histological images of human skin fragments after 7 days (D7) in culture, without ulcer (A), and with ulcer receiving 5 µl of daily treatments: Basal (B), NC (C), Nano-1 (D), and Nano-2 (E).
